# Supplementary material for: Phonon dynamics in MoSi2N4: insights from DFT calculations
Source: Royal Society of Chemistry journal article supplement (doi:10.1039/d3cp02921b), 2023-01-01
Supplement: d3cp02921b1.pdf [file d3cp02921b1.pdf]

## Supplementary materials

### Phonon dynamics in MoSi<sub>2</sub>N<sub>4</sub>. Insights from DFT calculations.

A.S. Oreshonkov<sup>1,2,3</sup>, E.V. Sukhanova<sup>1</sup>, Z.I. Popov<sup>1</sup>

<sup>1</sup>Emanuel Institute of Biochemical Physics of Russian Academy of Sciences, Moscow 119334,  
Russia;

<sup>2</sup>Laboratory of Molecular Spectroscopy, Kirensky Institute of Physics, Federal Research Center  
KSC SB RAS, Krasnoyarsk 660036, Russia

<sup>3</sup>School of Engineering and Construction, Siberian Federal University, Krasnoyarsk 660041,  
Russia;

Table S1. Structural data for  $\alpha 1$  structure.

| Cell length, Å     | <i>a</i> | <i>b</i> | <i>c</i>  |
|--------------------|----------|----------|-----------|
|                    | 2.910606 | 2.910606 | 24.989594 |
| Angle, °           | alpha    | beta     | gamma     |
|                    | 90       | 90       | 120       |
| Atomic coordinates | x        | y        | z         |
| Mo1                | 0.333333 | 0.666666 | 0.2       |
| Si1                | 0        | 0        | 0.319903  |
| Si2                | 0        | 0        | 0.080097  |
| N1                 | 0        | 0        | 0.149914  |
| N2                 | 0        | 0        | 0.250086  |
| N3                 | 0.666667 | 0.333333 | 0.059944  |
| N4                 | 0.666666 | 0.333333 | 0.340056  |

Table S2. Structural data for  $\alpha 2$  structure.

| Cell length, Å     | <i>a</i> | <i>b</i> | <i>c</i>  |
|--------------------|----------|----------|-----------|
|                    | 2.897820 | 2.897820 | 25.210600 |
| Angle, °           | alpha    | beta     | gamma     |
|                    | 90       | 90       | 120       |
| Atomic coordinates | x        | y        | z         |
| Mo1                | 0.333333 | 0.666666 | 0.2       |
| Si1                | 0        | 0        | 0.319621  |
| Si2                | 0        | 0        | 0.080379  |
| N1                 | 0        | 0        | 0.149994  |
| N2                 | 0        | 0        | 0.250006  |
| N3                 | 0.333334 | 0.666667 | 0.059738  |
| N4                 | 0.333333 | 0.666666 | 0.340262  |

Table S3. Structural data for  $\alpha 3$  structure.

| Cell length, Å     | <i>a</i> | <i>b</i> | <i>c</i>  |
|--------------------|----------|----------|-----------|
|                    | 2.912063 | 2.912063 | 24.964600 |
| Angle, °           | alpha    | beta     | gamma     |
|                    | 90       | 90       | 120       |
| Atomic coordinates | x        | y        | z         |
| Mo1                | 0.333333 | 0.666666 | 0.199597  |
| Si1                | 0        | 0        | 0.320844  |
| Si2                | 0        | 0        | 0.079292  |
| N1                 | 0        | 0        | 0.149197  |
| N2                 | 0        | 0        | 0.250526  |
| N3                 | 0.666667 | 0.333333 | 0.059060  |
| N4                 | 0.333333 | 0.666666 | 0.341484  |

Table S4. Energy difference of calculated stacking of bulk MoSi<sub>2</sub>N<sub>4</sub>

| Stacking                              | AB                   | AC      | AA     | AB*     | AC*     |
|---------------------------------------|----------------------|---------|--------|---------|---------|
| Configuration                         | $\alpha 1$ structure |         |        |         |         |
| Energy difference relative to AB (eV) | 0.0000               | -0.0004 | 0.0877 | 0.0849  | -0.0471 |
| Configuration                         | $\alpha 2$ structure |         |        |         |         |
| Energy difference relative to AB (eV) | 0.0000               | 0.0004  | 0.0840 | -0.0383 | 0.0821  |
| Configuration                         | $\alpha 3$ structure |         |        |         |         |
| Energy difference relative to AB (eV) | 0.0000               | 0.0001  | 0.0171 | -0.0235 | -0.0185 |

Table S5. Structural data for two layered  $\alpha 1$  structure.

| Cell length, Å     | <i>a</i> | <i>b</i> | <i>c</i>  |
|--------------------|----------|----------|-----------|
|                    | 2.910606 | 2.910606 | 40.000000 |
| Angle, °           | alpha    | beta     | gamma     |
|                    | 90       | 90       | 120       |
| Atomic coordinates | x        | y        | z         |
| Mo1                | 0.33333  | 0.66667  | 0.124950  |
| Mo2                | 0.33333  | 0.66667  | 0.374950  |
| Si1                | 0        | 0        | 0.199855  |
| Si2                | 0        | 0        | 0.050040  |
| Si3                | 0.66667  | 0.33333  | 0.449855  |
| Si4                | 0.66667  | 0.33333  | 0.300040  |
| N1                 | 0        | 0        | 0.093655  |
| N2                 | 0        | 0        | 0.156240  |
| N3                 | 0.66667  | 0.33333  | 0.037450  |
| N4                 | 0.66667  | 0.33333  | 0.212445  |
| N5                 | 0.66667  | 0.33333  | 0.343655  |
| N6                 | 0.66667  | 0.33333  | 0.406240  |
| N7                 | 0        | 0        | 0.287450  |
| N8                 | 0        | 0        | 0.462445  |

Table S6. Structural data for two layered  $\alpha_2$  structure.

| Cell length, Å     | <i>a</i> | <i>b</i> | <i>c</i>  |
|--------------------|----------|----------|-----------|
|                    | 2.89780  | 2.89780  | 40.000000 |
| Angle, °           | alpha    | beta     | gamma     |
|                    | 90       | 90       | 120       |
| Atomic coordinates | x        | y        | z         |
| Mo1                | 0.33333  | 0.66667  | 0.126055  |
| Mo2                | 0        | 0        | 0.376055  |
| Si1                | 0        | 0        | 0.201445  |
| Si2                | 0        | 0        | 0.050660  |
| Si3                | 0.33333  | 0.66667  | 0.451445  |
| Si4                | 0.33333  | 0.66667  | 0.300660  |
| N1                 | 0        | 0        | 0.094535  |
| N2                 | 0        | 0        | 0.157570  |
| N3                 | 0.33333  | 0.66667  | 0.037650  |
| N4                 | 0.33333  | 0.66667  | 0.214455  |
| N5                 | 0.33333  | 0.66667  | 0.344535  |
| N6                 | 0.33333  | 0.66667  | 0.407570  |
| N7                 | 0        | 0        | 0.287650  |
| N8                 | 0        | 0        | 0.464455  |

Table S7. Structural data for two layered  $\alpha_3$  structure.

| Cell length, Å     | <i>a</i> | <i>b</i> | <i>c</i>  |
|--------------------|----------|----------|-----------|
|                    | 2.91210  | 2.91210  | 40.000000 |
| Angle, °           | alpha    | beta     | gamma     |
|                    | 90       | 90       | 120       |
| Atomic coordinates | x        | y        | z         |
| Mo1                | 0.33333  | 0.66667  | 0.124570  |
| Mo2                | 0        | 0        | 0.374570  |
| Si1                | 0        | 0        | 0.200245  |
| Si2                | 0        | 0        | 0.049485  |
| Si3                | 0.33333  | 0.66667  | 0.450245  |
| Si4                | 0.33333  | 0.66667  | 0.299490  |
| N1                 | 0        | 0        | 0.093115  |
| N2                 | 0        | 0        | 0.156355  |
| N3                 | 0.66667  | 0.33333  | 0.036860  |
| N4                 | 0.33333  | 0.66667  | 0.213125  |
| N5                 | 0.33333  | 0.66667  | 0.343115  |
| N6                 | 0.33333  | 0.66667  | 0.406355  |
| N7                 | 0.66667  | 0.33333  | 0.286860  |
| N8                 | 0        | 0        | 0.463125  |

Table S8. Structural data for bulk  $\alpha 1$  structure.

| Cell length, Å     | <i>a</i> | <i>b</i> | <i>c</i>  |
|--------------------|----------|----------|-----------|
|                    | 2.910606 | 2.910606 | 10.000000 |
| Angle, °           | alpha    | beta     | gamma     |
|                    | 90       | 90       | 120       |
| Atomic coordinates | x        | y        | z         |
| Mo1                | 0.3333   | 0.66667  | 0.2499    |
| Mo2                | 0.3333   | 0.66667  | 0.7499    |
| Si1                | 0        | 0        | 0.39971   |
| Si2                | 0        | 0        | 0.10008   |
| Si3                | 0.66667  | 0.33333  | 0.89971   |
| Si4                | 0.66667  | 0.33333  | 0.60008   |
| N1                 | 0        | 0        | 0.18731   |
| N2                 | 0        | 0        | 0.31248   |
| N3                 | 0.66667  | 0.33333  | 0.07490   |
| N4                 | 0.66667  | 0.33333  | 0.42489   |
| N5                 | 0.66667  | 0.33333  | 0.68731   |
| N6                 | 0.66667  | 0.33333  | 0.81248   |
| N7                 | 0        | 0        | 0.57490   |
| N8                 | 0        | 0        | 0.92489   |

Table S9. Structural data for bulk  $\alpha 2$  structure.

| Cell length, Å     | <i>a</i> | <i>b</i> | <i>c</i>  |
|--------------------|----------|----------|-----------|
|                    | 2.897820 | 2.897820 | 10.000000 |
| Angle, °           | alpha    | beta     | gamma     |
|                    | 90       | 90       | 120       |
| Atomic coordinates | x        | y        | z         |
| Mo1                | 0.33333  | 0.66667  | 0.25211   |
| Mo2                | 0        | 0        | 0.75211   |
| Si1                | 0        | 0        | 0.40289   |
| Si2                | 0        | 0        | 0.10132   |
| Si3                | 0.33333  | 0.66667  | 0.90289   |
| Si4                | 0.33333  | 0.66667  | 0.60132   |
| N1                 | 0        | 0        | 0.18907   |
| N2                 | 0        | 0        | 0.31514   |
| N3                 | 0.33333  | 0.66667  | 0.07530   |
| N4                 | 0.33333  | 0.66667  | 0.42891   |
| N5                 | 0.33333  | 0.66667  | 0.68907   |
| N6                 | 0.33333  | 0.66667  | 0.81514   |
| N7                 | 0        | 0        | 0.57530   |
| N8                 | 0        | 0        | 0.92891   |

Table S10. Structural data for bulk  $\alpha 3$  structure.

| Cell length, Å     | <i>a</i> | <i>b</i> | <i>c</i>  |
|--------------------|----------|----------|-----------|
|                    | 2.912063 | 2.912063 | 10.000000 |
| Angle, °           | alpha    | beta     | gamma     |
|                    | 90       | 90       | 120       |
| Atomic coordinates | x        | y        | z         |
| Mo1                | 0.33333  | 0.66667  | 0.24914   |
| Mo2                | 0        | 0        | 0.74914   |
| Si1                | 0        | 0        | 0.40049   |
| Si2                | 0        | 0        | 0.09897   |
| Si3                | 0.33333  | 0.66667  | 0.90049   |
| Si4                | 0.33333  | 0.66667  | 0.59898   |
| N1                 | 0        | 0        | 0.18623   |
| N2                 | 0        | 0        | 0.31271   |
| N3                 | 0.66667  | 0.33333  | 0.07372   |
| N4                 | 0.33333  | 0.66667  | 0.42625   |
| N5                 | 0.33333  | 0.66667  | 0.68623   |
| N6                 | 0.33333  | 0.66667  | 0.81271   |
| N7                 | 0.66667  | 0.33333  | 0.57372   |
| N8                 | 0        | 0        | 0.92625   |

Table S11. Comparison of wavenumbers (in  $\text{cm}^{-1}$ ) of vibrations in the  $\alpha 1$  structure calculated using various DFT approaches.

| Expt. | <i>Irreps.</i> | LDA    | GGA<br>PBE [S1] | GGA<br>PBE TS<br>[S2] | GGA<br>PBESol<br>[S3] | GGA<br>BLYP<br>[S4] | meta-GGA<br>[S5] |
|-------|----------------|--------|-----------------|-----------------------|-----------------------|---------------------|------------------|
| -     | $E''$          | 126.4  | 128.9           | 126.7                 | 126.03                | 121.5               | 146.6            |
| -     | $E'$           | 169.2  | 167.0           | 163.3                 | 163.4                 | 168.5               | 157.7            |
| 289   | $A_1'$         | 285.1  | 289.9           | 291.0                 | 285.3                 | 297.51              | 324.7            |
| 348   | $A_2''$        | 386.3  | 379.5           | 383.3                 | 381.6                 | 378.5               | 406.3            |
| 589   | $E''$          | 568.2  | 531.9           | 538.5                 | 547.9                 | 529.3               | 493.6            |
| 634   | $E'$           | 647.1  | 612.3           | 621.2                 | 627.7                 | 600.5               | 588.3            |
| 692   | $A_1'$         | 703.3  | 686.1           | 691.0                 | 679.4                 | 700.2               | 742.5            |
|       | $A_2''$        | 704.9  | 686.5           | 691.4                 | 681.8                 | 703.0               | 872.9            |
| -     | $E''$          | 823.1  | 801.0           | 814.4                 | 811.8                 | 780.3               | 873.1            |
| -     | $E'$           | 823.4  | 801.3           | 814.7                 | 812.1                 | 780.6               | 873.1            |
|       | $A_2''$        | 1054.9 | 1021.5          | 1033.3                | 1023.8                | 1007.5              | 1046.6           |
| 1051  | $A_1'$         | 1060.4 | 1029.4          | 1040.1                | 1030.5                | 1018.6              | 1057.6           |

[S1] Perdew, J. P.; Burke, K.; Ernzerhof, M. Generalized Gradient Approximation Made Simple. *Phys. Rev. Lett.* 1996, 77 (18), 3865–3868. <https://doi.org/10.1103/PhysRevLett.77.3865>.

[S2] Tkatchenko, A.; Scheffler, M. Accurate Molecular Van Der Waals Interactions from Ground-State Electron Density and Free-Atom Reference Data. *Phys. Rev. Lett.* 2009, 102 (7), 073005. <https://doi.org/10.1103/PhysRevLett.102.073005>.

[S3] Perdew, J. P.; Ruzsinszky, A.; Csonka, G. I.; Vydrov, O. A.; Scuseria, G. E.; Constantin, L. A.; Zhou, X.; Burke, K. Restoring the Density-Gradient Expansion for Exchange in Solids and Surfaces. *Phys. Rev. Lett.* 2008, 100 (13), 136406. <https://doi.org/10.1103/PhysRevLett.100.136406>.

[S4] Becke, A. D. Density-Functional Exchange-Energy Approximation with Correct Asymptotic Behavior. *Phys. Rev. A* 1988, 38 (6), 3098–3100. <https://doi.org/10.1103/PhysRevA.38.3098>.

[S5] Bartók, A. P.; Yates, J. R. Regularized SCAN Functional. *The Journal of Chemical Physics* 2019, 150 (16), 161101. <https://doi.org/10.1063/1.5094646>.

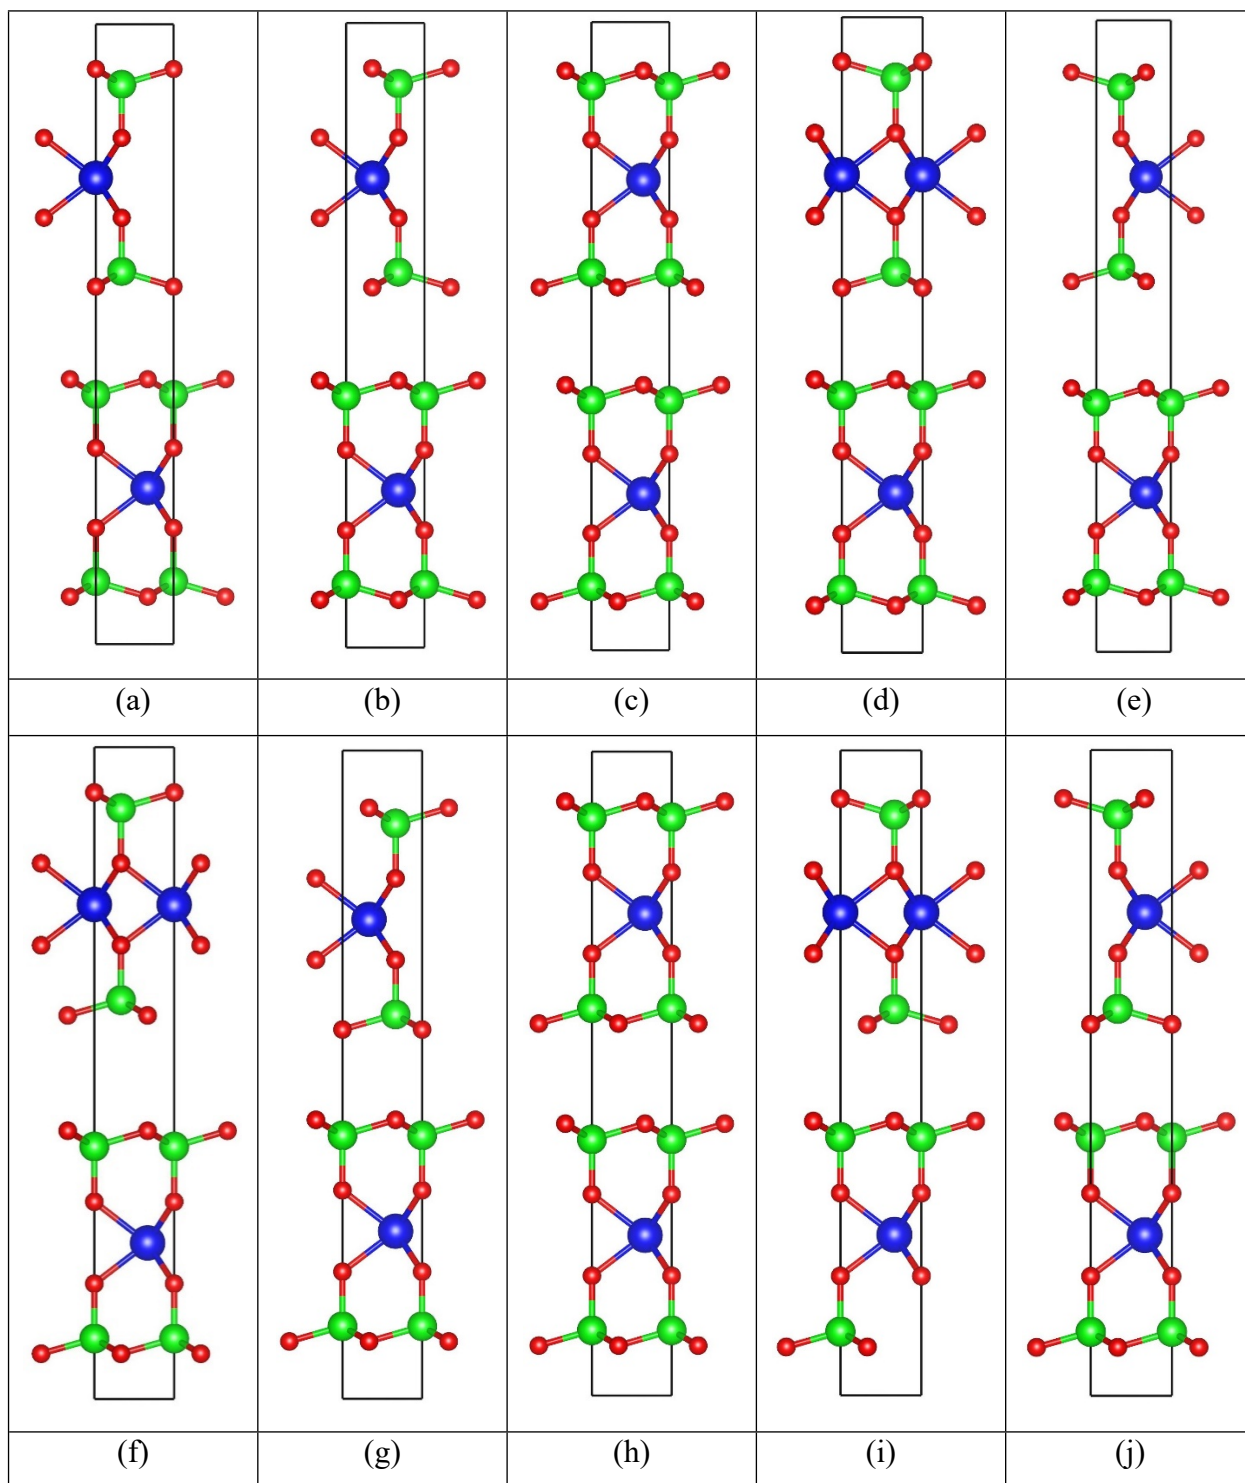

Figure S1. Proposed layer stacking patterns (a) AB, (b) AC, (c) AA, (d) AB\*, (e) AC\* and (f) AB, (g) AC, (h) AA, (i) AB\*, (j) AC\* for potentially plausible  $\alpha_2$  and  $\alpha_3$  structures of  $\text{MoSi}_2\text{N}_4$ , correspondingly.

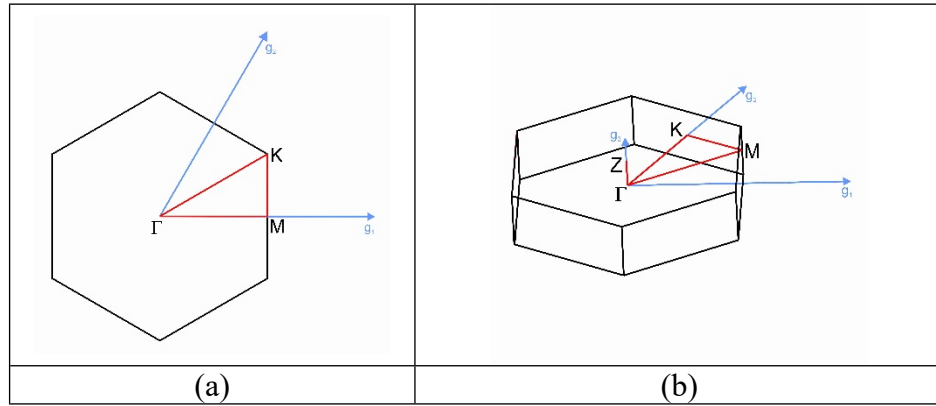

Figure S2. Schemes of Brillouin zone for single layer, double layer (a) and bulk (b)  $\text{MoSi}_2\text{N}_4$ .

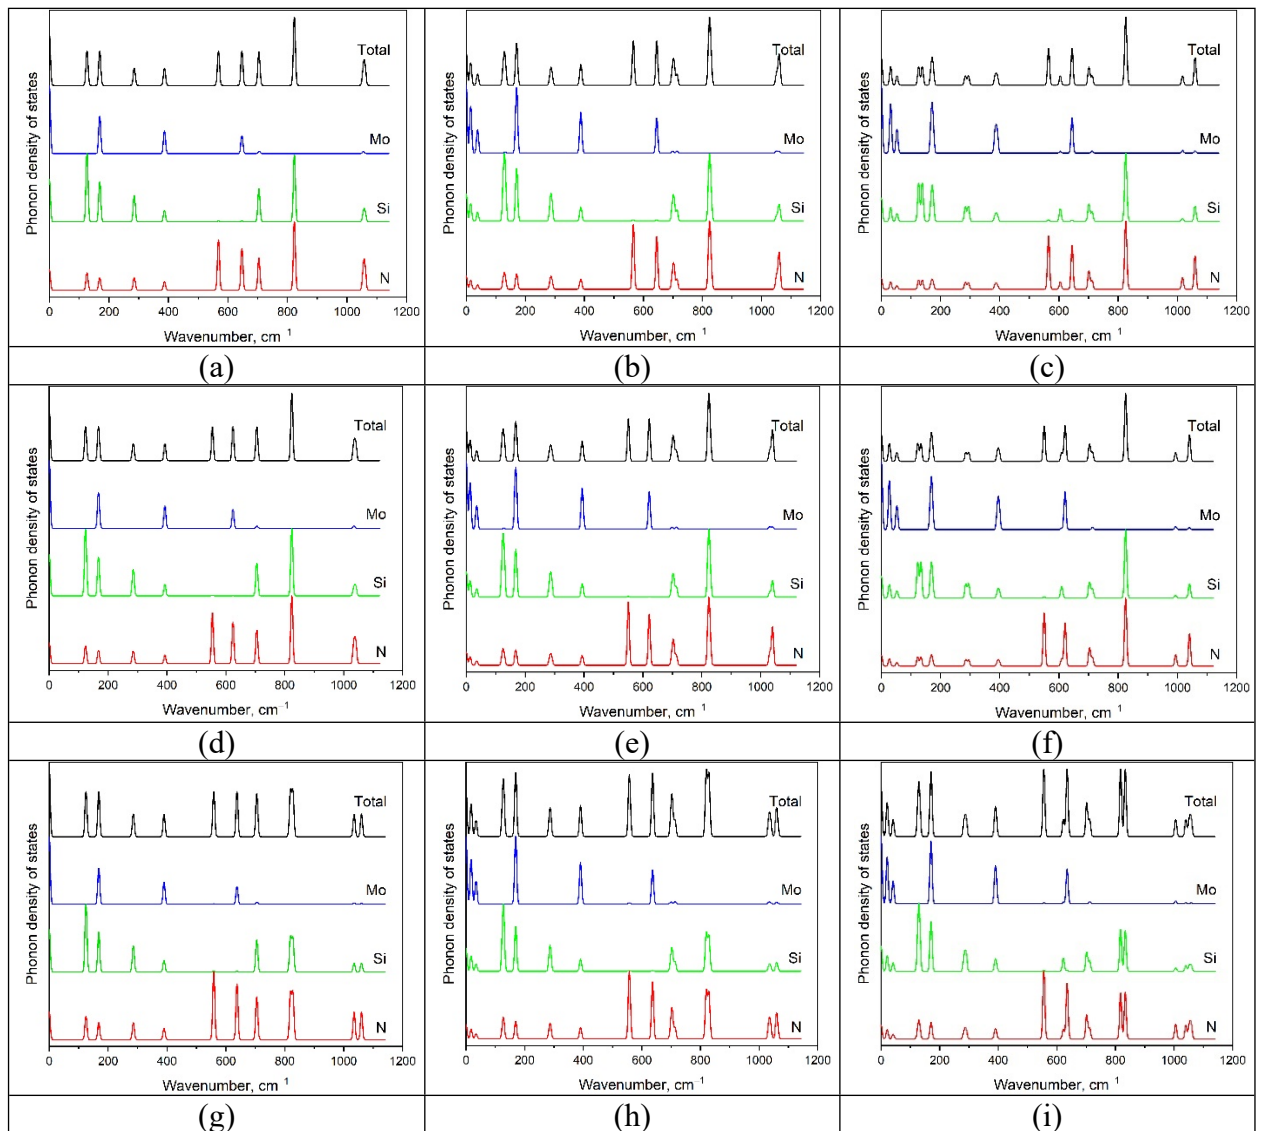

Figure S3. Total and partial phonon density of states for 1 layer, 2 layers and bulk structures of  $\alpha 1$  (a, b, c),  $\alpha 2$  (d, e, f) and  $\alpha 3$  (g, h, i)  $\text{MoSi}_2\text{N}_4$  configurations.



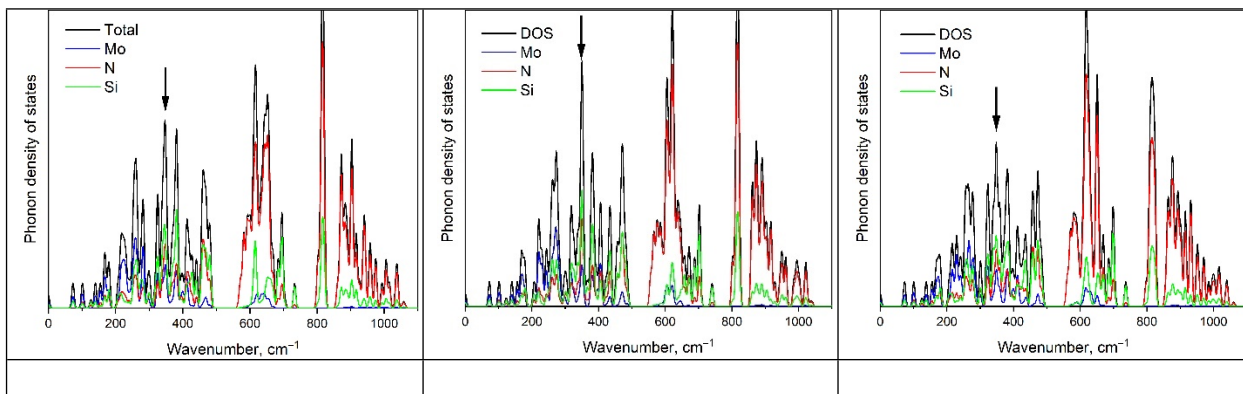

Figure S4. Phonon density of states simulated for  $\alpha 1$  (a),  $\alpha 2$  (b) and  $\alpha 3$  (c) monolayers.
